# Supplementary material for: ATM inhibition enhances Auranofin-induced oxidative stress and cell death in lung cell lines
Source: PLOS journal article supplement (doi:10.1371/journal.pone.0244060), 2020-12-18

# Figure 1 B – scanned original blots

HEK 293T – TRX1-CC/CS/SS -/+ H<sub>2</sub>O<sub>2</sub>

(1a) ATM

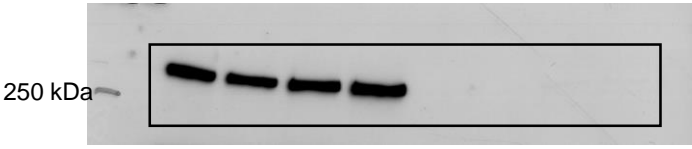

(1b) ATM

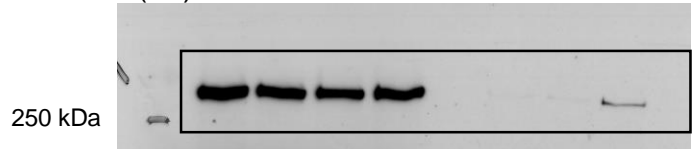

(2a) Vinculin

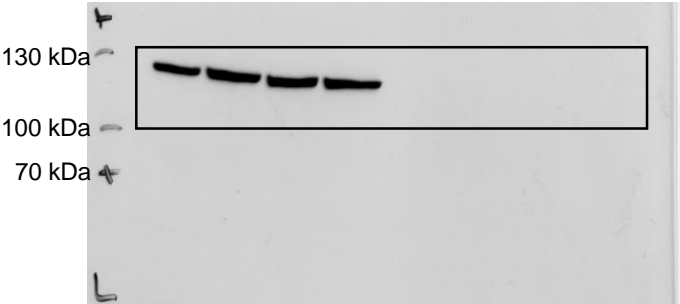

(2b) Vinculin

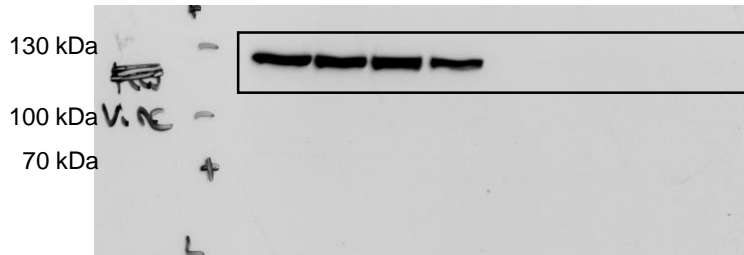

(3a) Vinculin, PRDX1

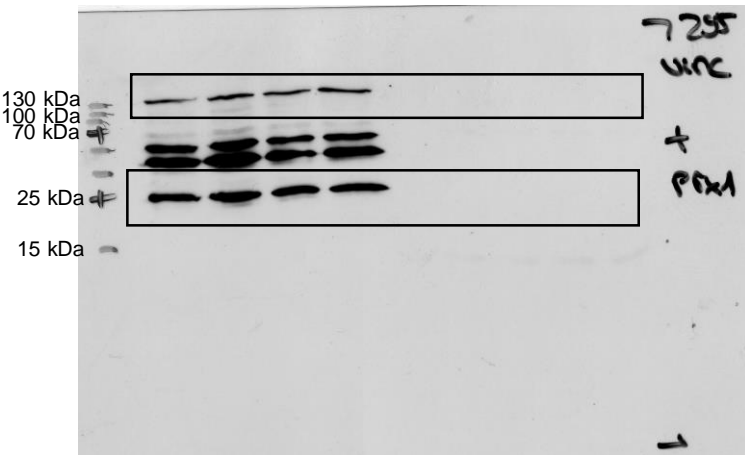

(3b) Vinculin, PRDX1

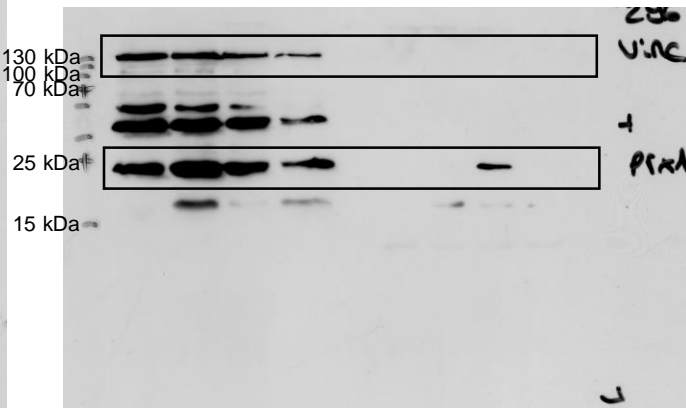

(4a) His

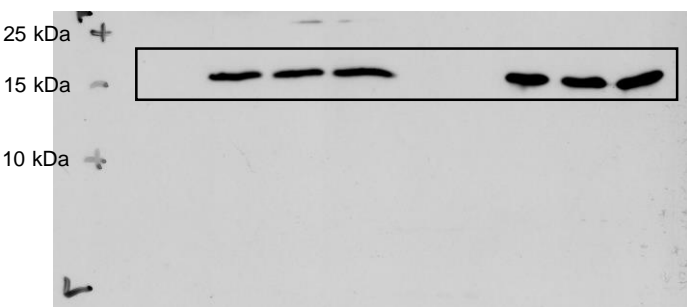

(4b) His

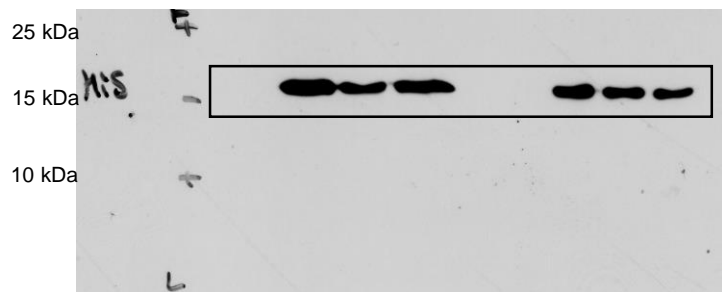

# Figure 1 C – scanned original blots

HEK 293T – TRX1-CS -/+ KU55933/Aura/H<sub>2</sub>O<sub>2</sub>

(1) ATM, Vinculin

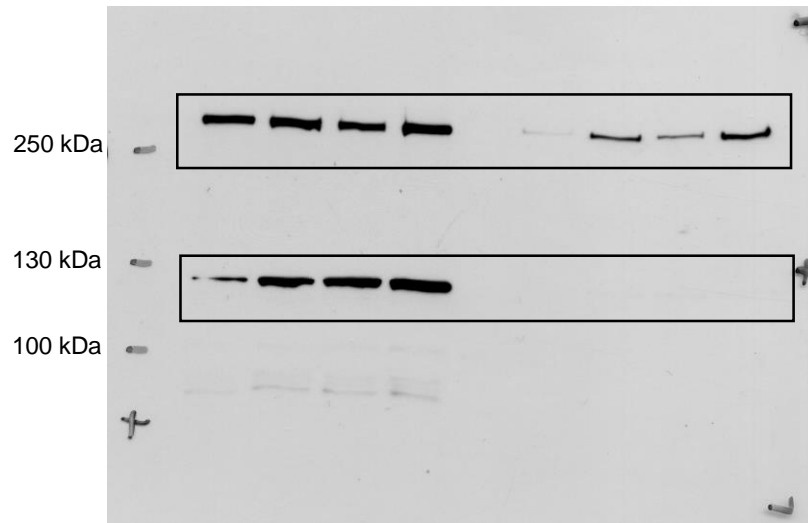

(2) PRDX1

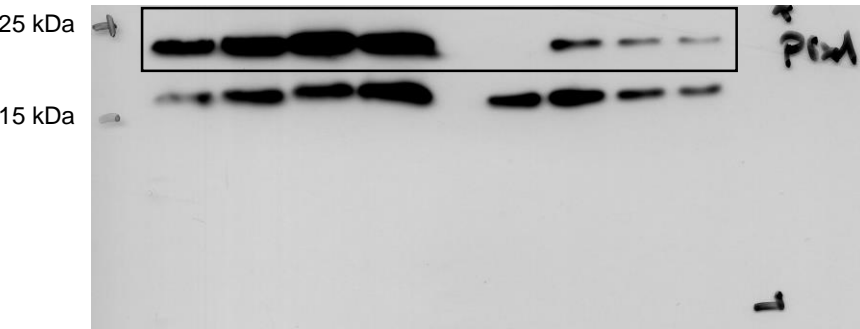

(3) His

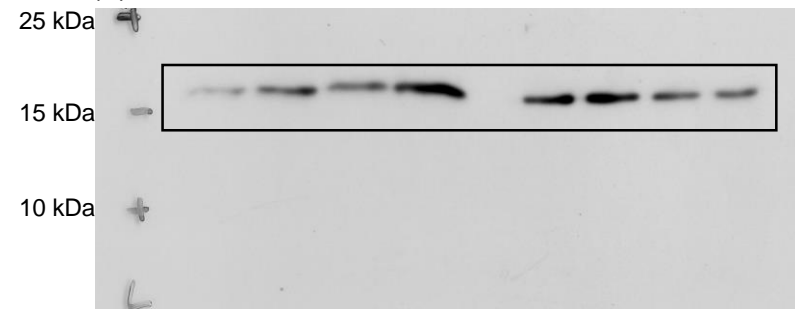

(4) GAPDH

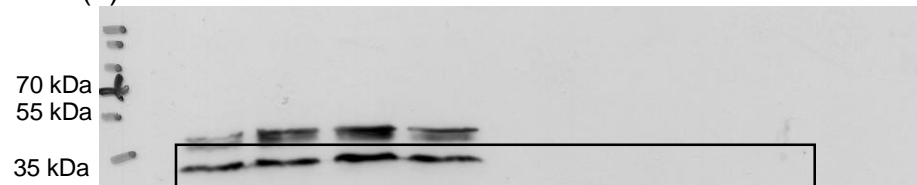

# Figure 3 A – scanned original blots

A549 +/- KU55933/Auranofin

(1) PRDX1

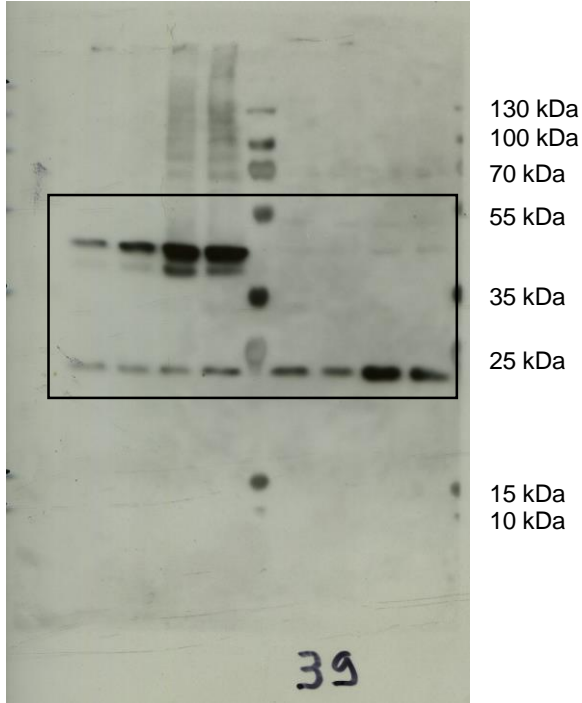

(2) Vinculin

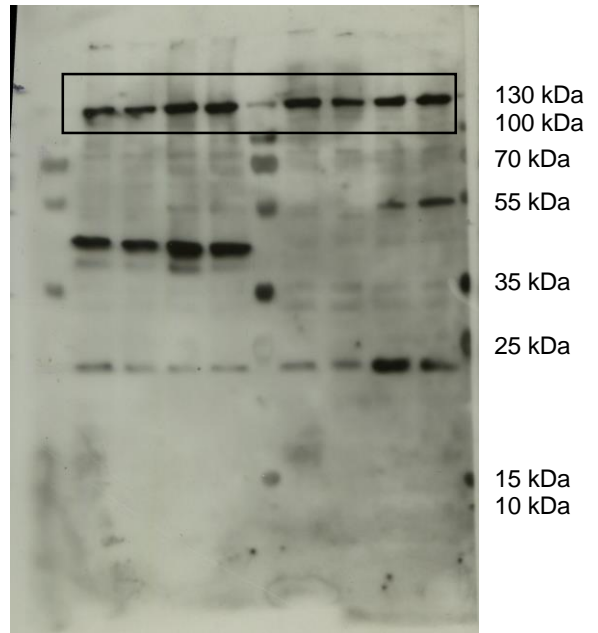

(3) PRDX3

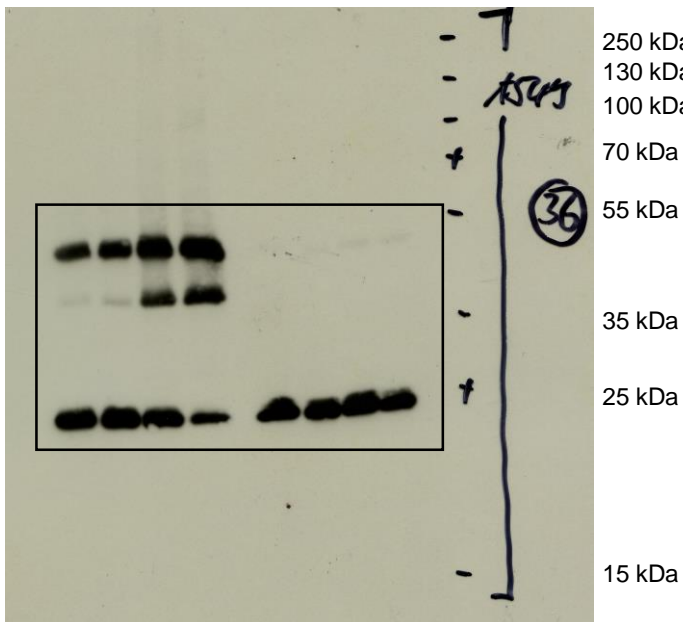

(4) Vinculin

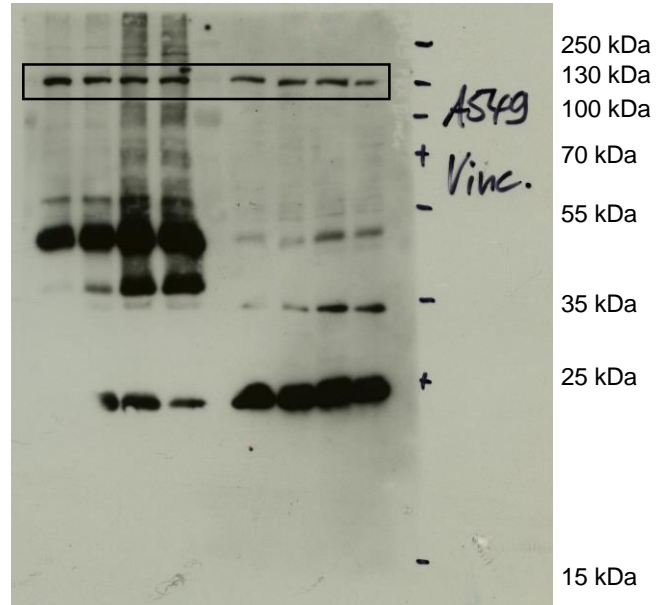

# Figure 3 B – scanned original blots

MLF +/- KU55933/Auranofin

(1) PRDX1

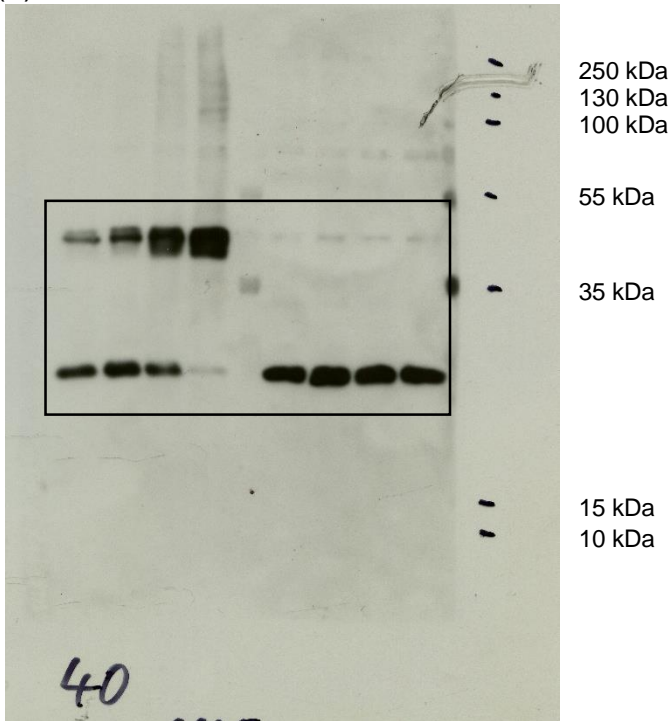

(2) Vinculin

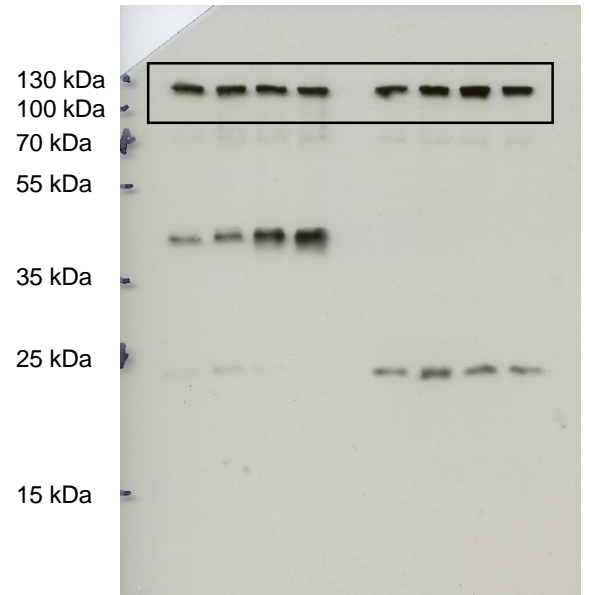

(3) PRDX3

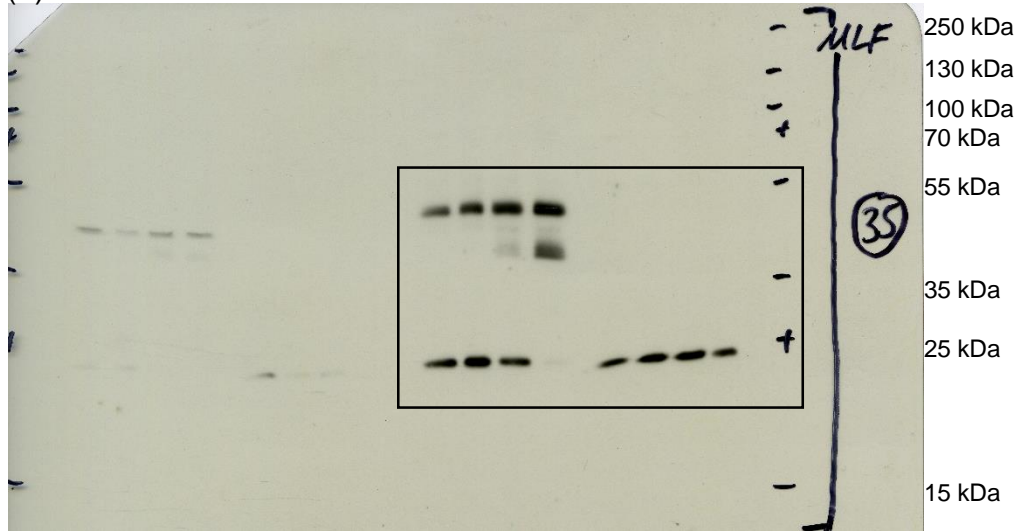

(4) Vinculin

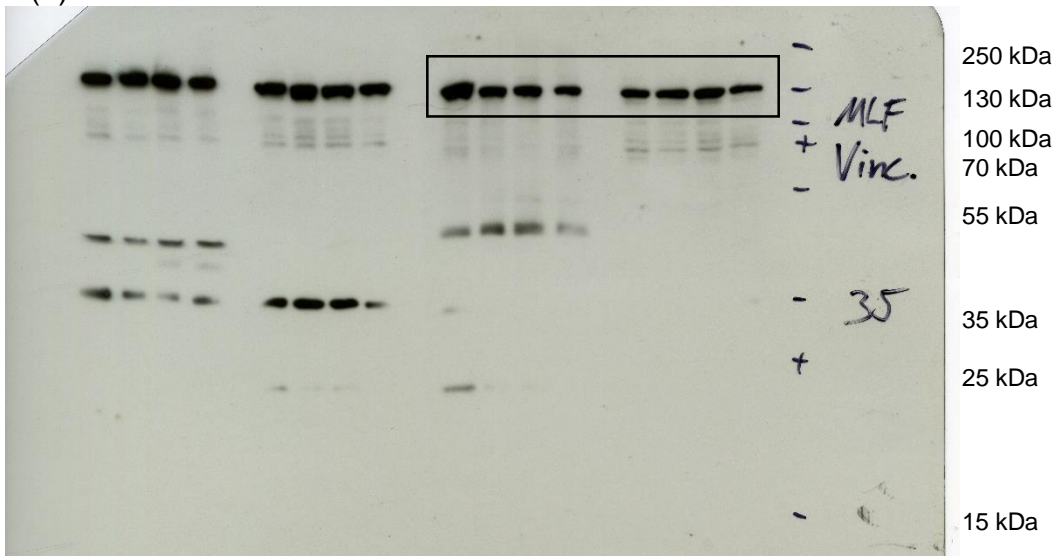

# Figure 4 A – scanned original blots

A549 +/- Auranofin/Bleomycin

(1) pATM

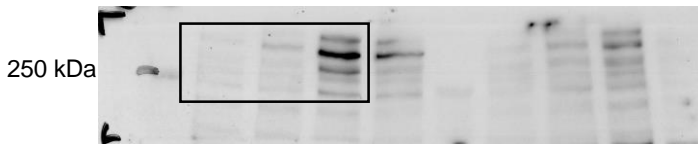

(2) ATM

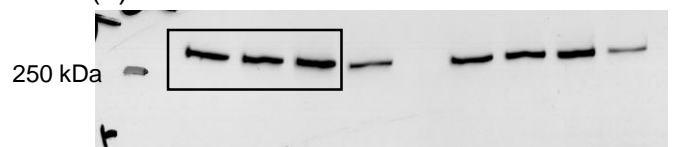

(3) pChk2

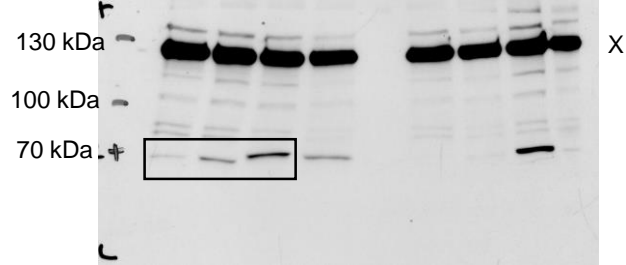

(4) Chk2

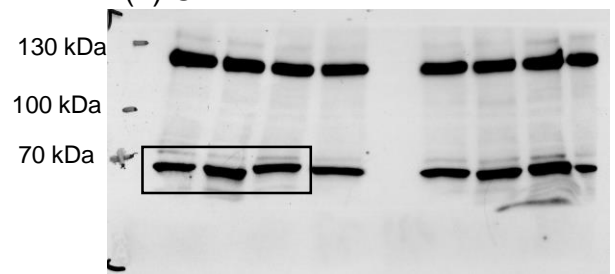

(5) Vinculin

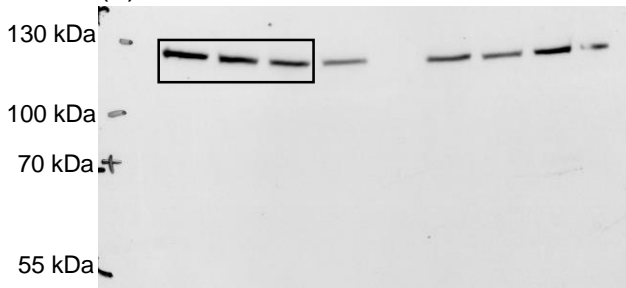

(6)  $\gamma$ H2AX

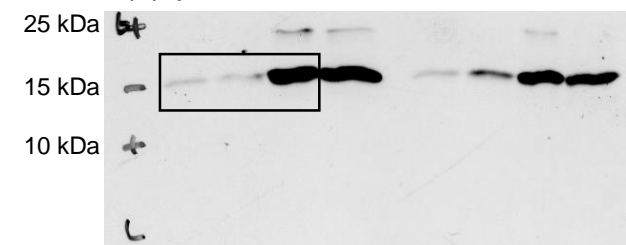

(3) H2AX

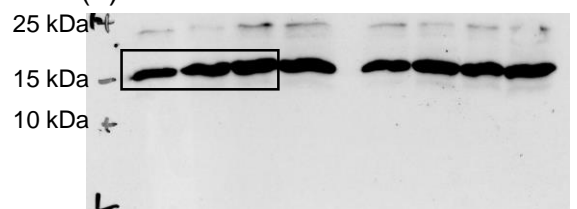

(3)  $\beta$ -Actin

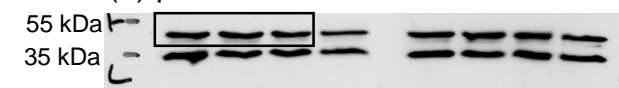

# Figure 4 B – scanned original blots

A549 +/- KU55933/Auranofin

(1) pChk2

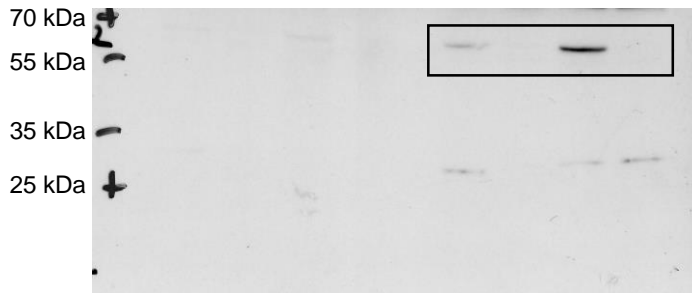

(2) Chk2

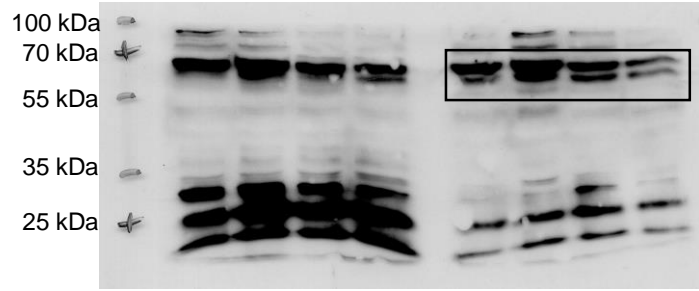

(3) GAPDH

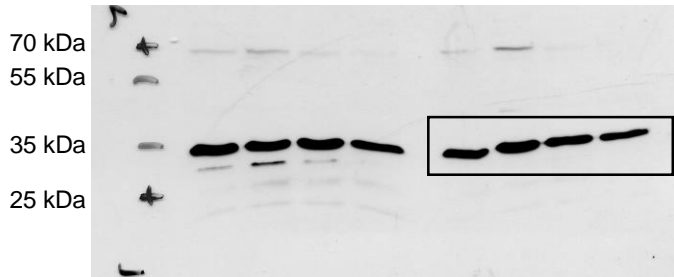

# Figure 4 C – scanned original blots

HEK 293T – TRX1-CS -/+ Bleomycin/H<sub>2</sub>O<sub>2</sub>

(1) ATM, Vinculin

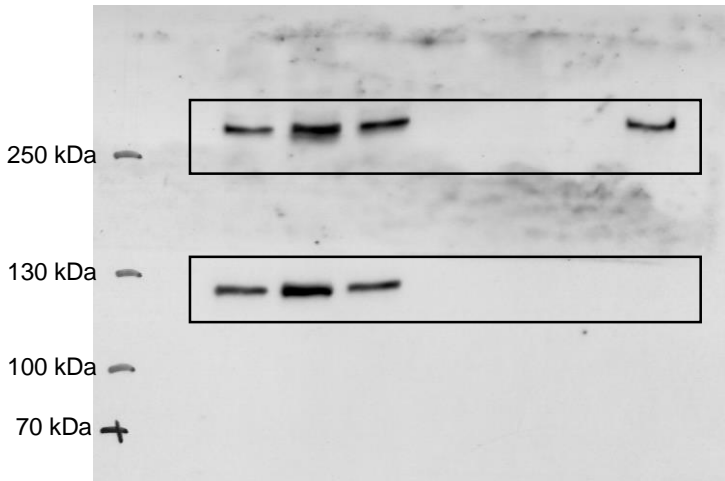

(2) PRDX1

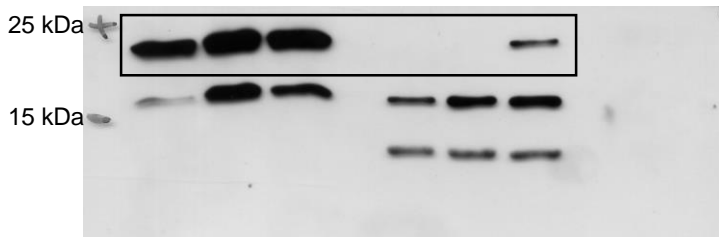

(3) His

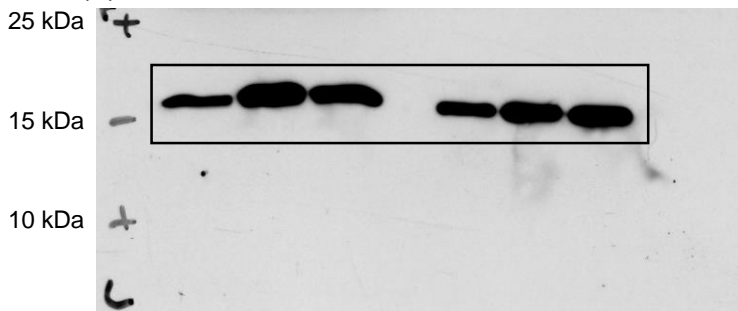

(4)  $\beta$ -Actin

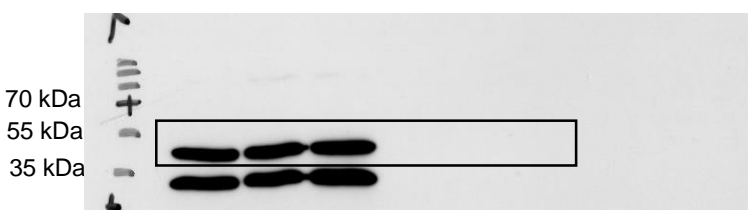

# Figure S1 A – scanned original blots

HEK 293T – TRX1-CS  $-/+$  H<sub>2</sub>O<sub>2</sub>

(1) ATM, Vinculin

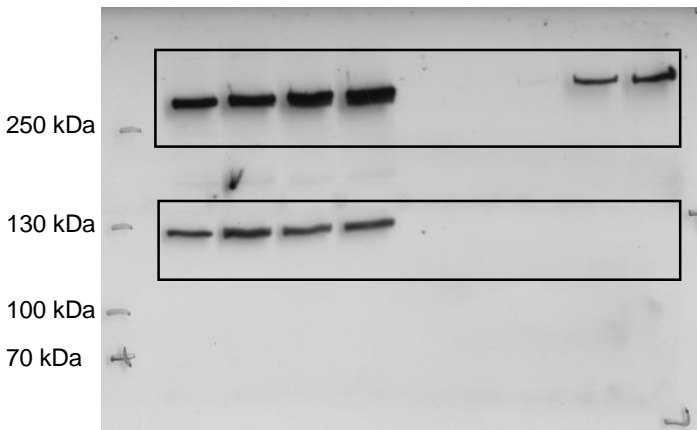

(2) PRDX1

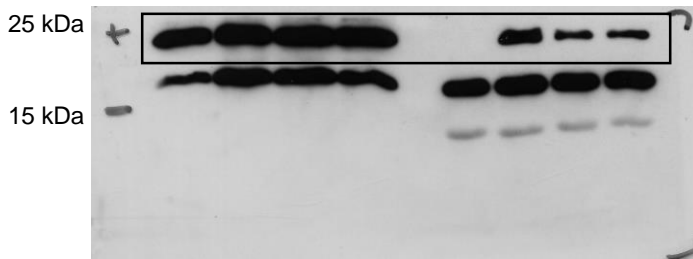

(3) His

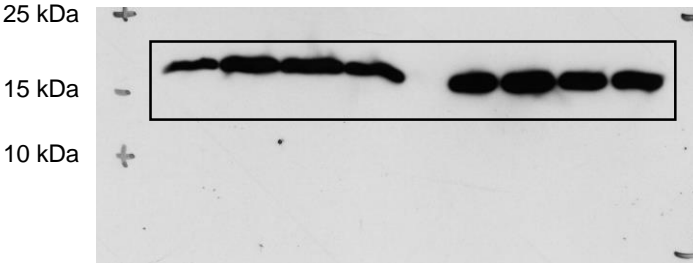

(4)  $\beta$ -Actin

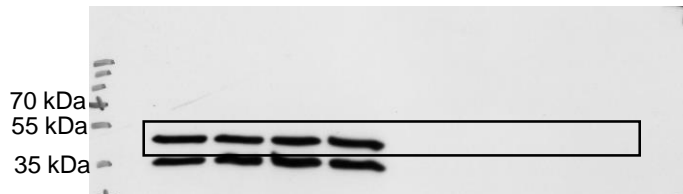



# Figure S1 B – scanned original blots

HEK 293T – TRX1-CS -/+ KU55933/H<sub>2</sub>O<sub>2</sub>

(1) ATM, Vinculin

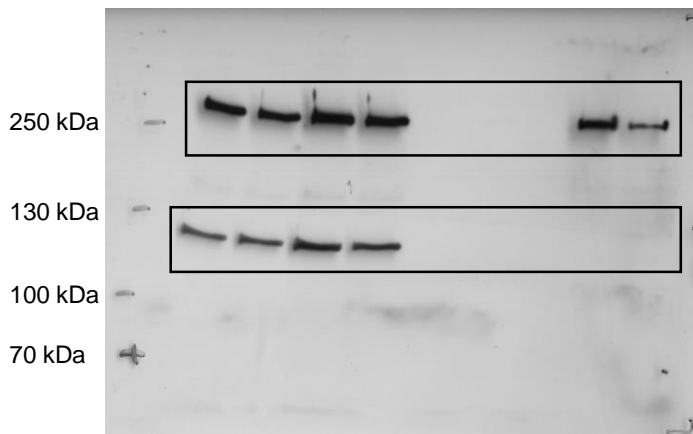

(2) PRDX1

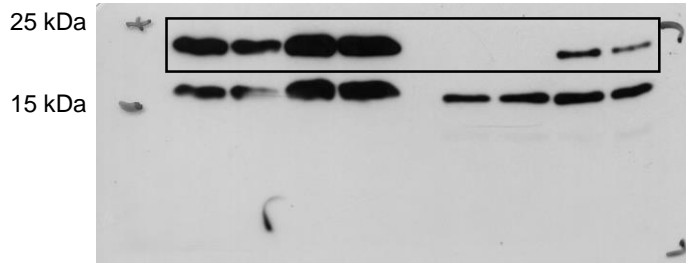

(3) His

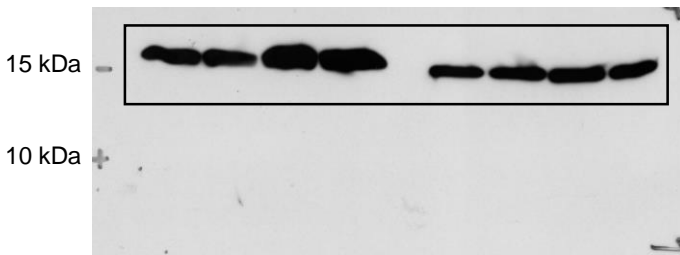

(4)  $\beta$ -Actin

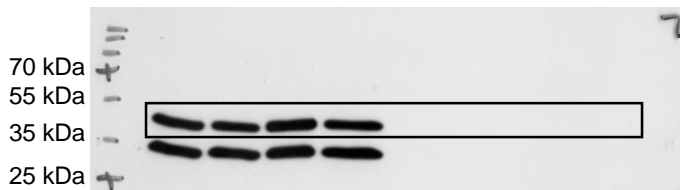

Supplement: S2 (10.1371/journal.pone.0244060.s002) [file journal.pone.0244060.s002.pdf]
